# Supplementary material
Source: PubMed Central journal article supplement (PMC3136289)
Supplement: 1102274108_pnas.201102274SI.pdf [file 1102274108_pnas.201102274SI.pdf]

# Supporting Information

Coelho et al. 10.1073/pnas.1102274108

## SI Materials and Methods

**Biological Material.** Three of the *Ectocarpus* strains used in this study were offspring of a field sporophyte collected in 1988 in San Juan de Marcona, Peru (Ec 17). These strains were Ec 32 (wild-type male), Ec 25 (wild-type female), and Ec 137 (male individual carrying the spontaneous *immediate upright* mutation; ref. 1). Ec 32 is the strain for which a complete genome sequence is available (2). The *immediate upright* mutation was introgressed into a female background by crossing with Ec 25 and isolating meiotic offspring from the resulting sporophyte Ec 372 (1). The female *imm* strain was designated Ec 419. The *ourobos* mutant strain (Ec 494) was produced by UV mutagenesis of strain Ec 32 (see below). Ec 494 was back-crossed with Ec 25, resulting in sporophytes heterozygous for *oro*, which in turn produced a generation of gametophytes that carried *oro*. These gametophytes should have had a reduced level of any additional substitutions introduced during the mutagenesis. These gametophytes were either female (e.g., Ec 560) or male. One of the male strains (Ec 561) was used for a cross with a genetically more distantly related female strain [Ec 568, meiotic offspring of a field sporophyte (Ec 721) from Arica, northern Chile (3)]. Note that offspring derived by asexual, clonal propagation (e.g., via mitospores or parthenogenetic regeneration of gametes) were considered to be identical to their parents and retained the same strain number. For further details, see Table S6.

Cultivation, crossing, raising of sporophytes from zygotes, isolation of meiotic families, and sexing of gametophyte strains were carried out as described (3, 4). Day length was 10-h light: 14-h dark. For the study of germination, spores or gametes were allowed to settle on coverslips. Zygotes were produced and isolated as described by Peters et al. (4). The sex of gametophytes was determined by microscopic observation of zygote formation in hanging-drop preparations (5) in which the strains to be tested had been combined with fertile thalli of male and female reference strains. Genetic analysis of meiotic offspring followed (6).

**Photopolarization Tests.** Gametophytes and sporophytes were grown at low density in 5-cm (7–8 mL) Petri dishes under unidirectional white light. The orientation of germination was scored ( $n > 300$ ) according to four quadrants (i.e., toward the light, away from the light, or in one of the two quadrants perpendicular to the light). Algae that germinated into the quadrant away from the light were scored as exhibiting negative phototrophy.

**Microarray Analysis of mRNA Abundances.** The microarray used to evaluate mRNA abundance in wild-type and mutant algae has been described (7). The microarray is based on 17,119 contig and singleton sequences derived from 90,637 EST sequences that have been mapped to 10,600 of the 16,256 genes identified in the *Ectocarpus* genome (2).

To prepare material for the microarray analysis, the *imm* and *oro* mutants were crossed, and one of the resulting diploid sporophytes was used to produce a segregating population of 269 gametophytes. Parthenotes were derived from these gametophytes by gamete germination and were classified into four groups based on morphological phenotype during early development: wild-type, *imm* mutants, *oro* mutants, and *imm oro* double mutants. RNA was extracted in triplicate (three biological replicates) from 12 bulked segregants from each of these groups and from wild-type gametophyte material (Ec 32). The parthenotes were allowed to fully develop vegetatively before harvesting, with many individuals carrying plurilocular zoidangia (i.e., either sporangia or gametangia depending on the life cycle

generation). Partheno-sporophytes were harvested before they produced unilocular sporangia. Bulk segregants were used to minimize variation due to unlinked polymorphic loci that may have been segregating in the population. RNA was extracted from ~300 mg (wet weight) of tissue following a modified version (1) of the protocol described by Apt et al. (8). Briefly, this protocol involved extraction with a cetyltrimethylammonium bromide (CTAB)-based buffer and subsequent phenol-chloroform purification, LiCl-precipitation, and DNase digestion (Turbo DNase, Ambion) steps. RNA quality and concentration was then analyzed on 1.5% agarose gel stained with ethidium bromide and a NanoDrop ND-1000 spectrophotometer (NanoDrop Products).

Double-stranded cDNA was synthesized and amplified with the SMART cDNA synthesis kit (Clontech) and the M-MuLV reverse transcriptase (Finnzymes) starting from 100 ng of total RNA. The PCR amplification was optimized for each sample so that the minimum number of cycles necessary to produce good-quality cDNA (between 19 and 27 depending on the sample) was used. After phenol:chloroform:isoamyl alcohol (25:24:1) extraction and ethanol precipitation, the cDNA was resuspended in 14  $\mu$ L of water. cDNA samples used for microarray hybridizations were required to fulfill the following quality criteria: concentration  $> 250 \mu\text{g l}^{-1}$ ,  $A_{260}/_{280} \geq 1.7$ ,  $A_{260}/_{230} \geq 1.5$ , median size  $\geq 400$  bp. Hybridizations were carried out as described (7), and statistical analysis was carried out using the Statistical Analysis of Microarrays (SAM) method (9) in the TIGR MeV package (Version 3.1). Gene Ontology (GO) annotation was used to assign genes to functional categories (<http://www.geneontology.org>). To identify general trends, the GO annotation was converted into GO slim annotation.

To carry out a global cluster analysis, a one-way ANOVA test (with  $P$  values adjusted using the Benjamini Hochberg method) was carried out to identify genes that exhibited significant variances in transcript abundance across the five sample classes. The 4,046 genes identified by this test were then grouped into four clusters of 1,352; 1,262; 1,032; and 400 genes using uncentered Pearson correlation distance and Ward linkage. These clusters included 230, 207, 136, and 56 genes with GO annotations, respectively. To identify overrepresented or underrepresented categories of gene function, the GO annotations were converted to GO slim annotations (using GOslim\_pir; <http://www.geneontology.org/GO.slims.shtml>) and, for each cluster, the abundance of each category was compared with its abundance in the genome as a whole.

**qRT-PCR Analysis of mRNA Abundances.** Total RNA was extracted from three biological replicates of wild-type, *imm* mutant, *oro* mutant, and *oro imm* double mutant parthenotes and from wild-type gametophytes using a protocol adapted from ref. 8. The samples used for qRT-PCR analysis were not the same as those analyzed in the microarray experiment. Contaminating genomic DNA was eliminated by DNase treatment by using the TURBO DNA-free kit (Applied Biosystems). The concentration and quality of the RNA was determined by spectrophotometry and agarose gel electrophoresis. Between 0.2 and 2.0  $\mu\text{g}$  of total RNA was reverse-transcribed to produce cDNA using the SuperScript First-Strand Synthesis System for RT-PCR (Invitrogen). Real-time qRT-PCR was performed on RNA from pooled samples (10 different strains for each phenotype, in triplicate).

Primer pairs were designed using the Primer3 software (<http://frodo.wi.mit.edu/primer3/>) so that the amplified fragment corresponded to the 3'UTR region or the most 3' exon of the gene

being analyzed (Table S7). Primer parameters were as follows: amplicon size 80–180 bp, primer length between 18 and 24 nucleotides (optimum 20 nucleotides),  $T_m$  between 59 °C and 61 °C (optimum 60 °C), %GC between 30% and 70% (optimum 50%). The specificity of the primers was tested both by comparing with the *Ectocarpus* genome and cDNA database sequence using Blast and by carrying out *in silico* PCR simulations using the e-PCR program (10).

qRT-PCR was carried out using the ABsolute QPCR SYBR Green ROX Mix (ThermoScientific) in a Chromo4 thermocycler (Bio-Rad Laboratories), and data were analyzed with the Opticon

monitor 3 software (Bio-Rad Laboratories). The specificity of amplification was checked using a dissociation curve. The amplification efficiency was tested using a genomic dilution series and was always between 90% and 110%. To allow quantification, a standard curve was established for each gene by using a range of dilutions of *Ectocarpus* genomic DNA (between 80 and 199,600 copies), and expression level was normalized against the *EF1 $\alpha$*  reference gene (11). Two technical replicates were carried out for the standard curves and three technical replicates for the samples. The data shown correspond to mean  $\pm$  SE for three biological replicates.

- Peters AF, et al. (2008) Life-cycle-generation-specific developmental processes are modified in the *immediate upright* mutant of the brown alga *Ectocarpus siliculosus*. *Development* 135:1503–1512.
- Cock JM, et al. (2010) The *Ectocarpus* genome and the independent evolution of multicellularity in brown algae. *Nature* 465:617–621.
- Peters AF, et al. (2010) Genetic diversity of *Ectocarpus* (Ectocarpales, Phaeophyceae) in Peru and northern Chile, the area of origin of the genome-sequenced strain. *New Phytol* 188:30–41.
- Peters AF, Scornet D, Müller DG, Kloareg B, Cock JM (2004) Inheritance of organelles in artificial hybrids of the isogamous multicellular chromist alga *Ectocarpus siliculosus* (Phaeophyceae). *Eur J Phycol* 39:235–242.
- Kawai H, Motomura T, Okuda K (2005) Isolation and purification techniques for macroalgae. *Algal Culture Techniques*, ed Anderson RA (Elsevier, Amsterdam), pp 133–143.
- Müller DG (1991) Mendelian segregation of a virus genome during host meiosis in the marine brown alga *Ectocarpus siliculosus*. *J Plant Physiol* 137:739–743.
- Dittami SM, et al. (2009) Global expression analysis of the brown alga *Ectocarpus siliculosus* (Phaeophyceae) reveals large-scale reprogramming of the transcriptome in response to abiotic stress. *Genome Biol* 10:R66.
- Apt KE, Clendennen SK, Powers DA, Grossman AR (1995) The gene family encoding the fucoxanthin chlorophyll proteins from the brown alga *Macrocystis pyrifera*. *Mol Gen Genet* 246:455–464.
- Tusher VG, Tibshirani R, Chu G (2001) Significance analysis of microarrays applied to the ionizing radiation response. *Proc Natl Acad Sci USA* 98:5116–5121.
- Schuler GD (1997) Sequence mapping by electronic PCR. *Genome Res* 7:541–550.
- Le Bail A, et al. (2008) Normalisation genes for expression analyses in the brown alga model *Ectocarpus siliculosus*. *BMC Mol Biol* 9:75.

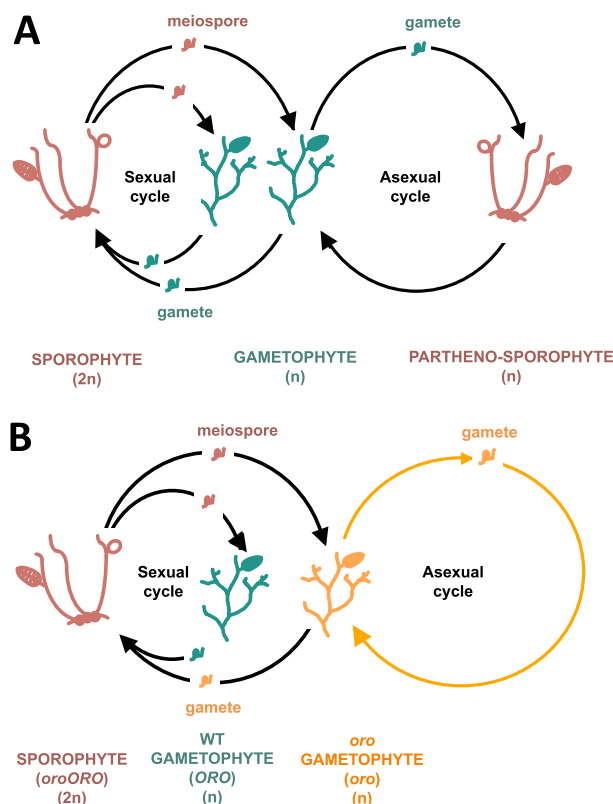

Fig. S1. Comparison of life cycle transitions in wild-type *Ectocarpus* (A) and in the *oro* mutant (B).

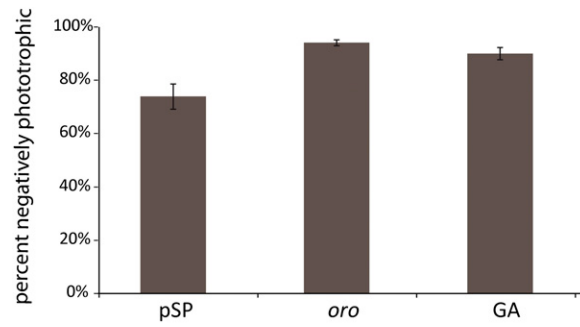

**Fig. S2.** Photopolarization of *oro* and wild-type *Ectocarpus* germlings in response to unidirectional light. The negative phototropic responses of wild-type gametophytes and of *oro* parthenotes were significantly more marked than those of the wild-type sporophytes. No significant difference was found between the responses of *oro* and wild-type gametophytes. pSP, wild-type partheno-sporophyte; GA, wild-type gametophyte. Error bars show SDs.

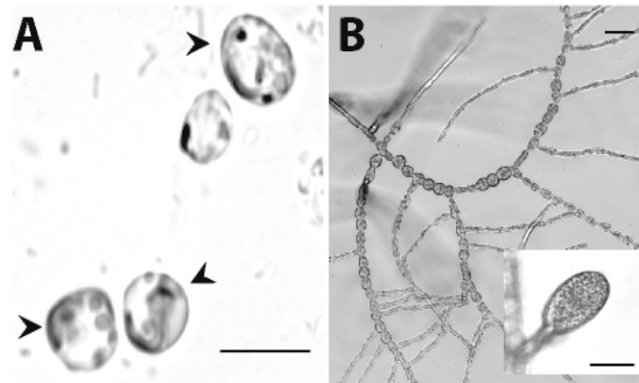

**Fig. S3.** Sporophyte produced by crossing an *oro* and a wild-type strain. (A) Fusion of gametes produces zygotes (arrowheads). (B) Zygotes grow into diploid sporophytes, which develop unilocular sporangia (*Inset*) where meiosis takes place. (Scale bars: 10  $\mu$ m.)

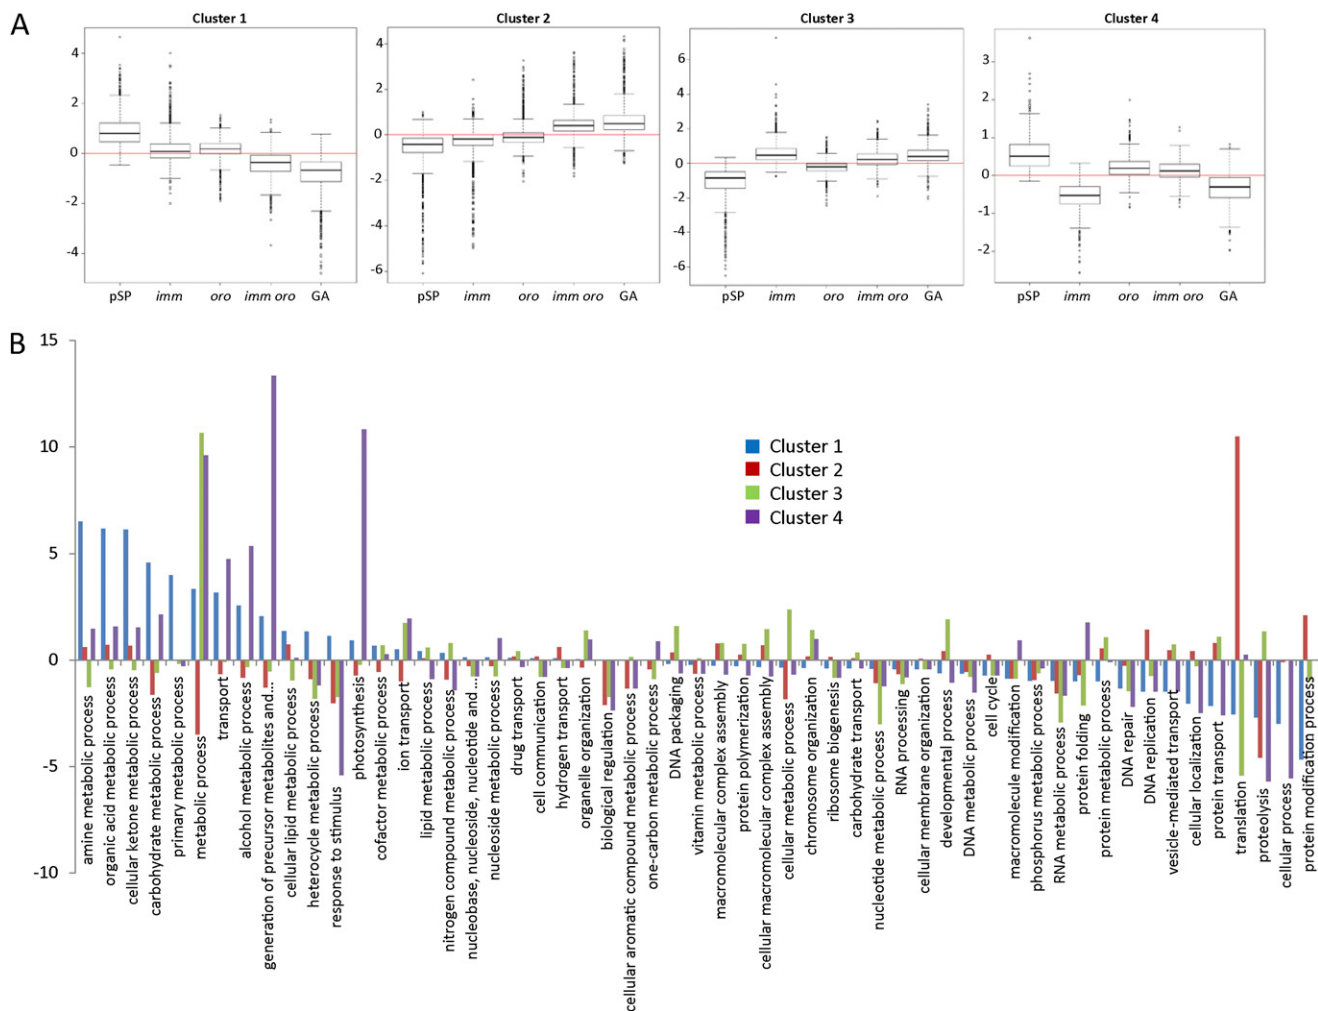

**Fig. S4.** Cluster analysis of the data from the microarray analysis of transcript abundance in sporophyte, gametophyte, and mutant individuals. (A) Box plots showing the trends in transcript abundance for four clusters of genes that had been identified as being differentially expressed by ANOVA test (see [SI Materials and Methods](#)). Clusters 1–4 contain 1,352, 1,262, 1,032, and 400 genes, respectively. Log2 transcript abundances for each gene are presented as the hybridization signal divided by a reference value corresponding to the median hybridization signal for that gene across all of the samples analyzed. (B) Percentage abundance of genes with specific GO slim assignments within each cluster relative to the abundance of genes with the same GO slim assignment in the genome as a whole. Only GO slim categories that represent at least 0.3% of the total in the genome as a whole are shown. pSP, wild-type partheno-sporophyte; GA, wild-type gametophyte.

**Table S1. Phenotypic analysis of families of gametophytes derived from individual unilocular sporangia from sporophytes heterozygous at the *ORO* locus**

| Unilocular sporangium | No. of individuals* | No. of wild-type individuals | No. of <i>oro</i> individuals |
|-----------------------|---------------------|------------------------------|-------------------------------|
| 1                     | 24                  | 10                           | 14                            |
| 2                     | 25                  | 13                           | 12                            |
| 3                     | 26                  | 10                           | 16                            |
| 4                     | 24                  | 11                           | 13                            |
| 5                     | 25                  | 13                           | 12                            |
| 6                     | 26                  | 15                           | 11                            |
| 7                     | 19                  | 11                           | 8                             |
| 8                     | 25                  | 8                            | 17                            |
| 9                     | 22                  | 5                            | 17                            |
| 10                    | 21                  | 13                           | 8                             |
| 11                    | 25                  | 14                           | 11                            |
| 12                    | 25                  | 13                           | 12                            |
| 13                    | 25                  | 12                           | 13                            |
| 14                    | 27                  | 14                           | 13                            |
| Total                 | 339                 | 162                          | 177                           |

\*Number of individuals scored per unilocular sporangium.

**Table S2. Determination of the sex of families of *oro* gametophytes derived from individual unilocular sporangia from sporophytes heterozygous at the *ORO* locus**

| Unilocular sporangium | No. of <i>oro</i> females | No. of <i>oro</i> males |
|-----------------------|---------------------------|-------------------------|
| 1                     | 3                         | 4                       |
| 2                     | 1                         | 6                       |
| 3                     | 3                         | 5                       |
| 4                     | 4                         | 2                       |
| 5                     | 5                         | 2                       |
| 6                     | 1                         | 4                       |
| 7                     | 5                         | 4                       |
| 8                     | 4                         | 7                       |
| 9                     | 3                         | 4                       |
| 10                    | 0                         | 3                       |
| 11                    | 2                         | 1                       |
| 12                    | 2                         | 6                       |
| Total                 | 33                        | 48                      |

**Table S3. Phenotypic analysis of families of gametophytes derived from individual unilocular sporangia from sporophytes heterozygous for both the *oro* and *imm* mutations**

| Unilocular sporangium | No. of WT individuals | No. of <i>oro</i> individuals | No. of <i>imm</i> individuals | No. of <i>oro imm</i> individuals |
|-----------------------|-----------------------|-------------------------------|-------------------------------|-----------------------------------|
| 1                     | 6                     | 8                             | 1                             | 1                                 |
| 2                     | 8                     | 2                             | 0                             | 10                                |
| 3                     | 2                     | 3                             | 1                             | 3                                 |
| 4                     | 9                     | 6                             | 1                             | 4                                 |
| 5                     | 4                     | 8                             | 4                             | 0                                 |
| 6                     | 6                     | 3                             | 3                             | 7                                 |
| 7                     | 4                     | 6                             | 5                             | 5                                 |
| 8                     | 4                     | 7                             | 2                             | 5                                 |
| 9                     | 1                     | 8                             | 10                            | 0                                 |
| 10                    | 9                     | 3                             | 8                             | 0                                 |
| 11                    | 4                     | 6                             | 2                             | 6                                 |
| 12                    | 1                     | 3                             | 5                             | 10                                |
| 13                    | 5                     | 4                             | 5                             | 6                                 |
| 14                    | 3                     | 3                             | 4                             | 7                                 |
| 15                    | 4                     | 3                             | 2                             | 4                                 |
| 16                    | 4                     | 2                             | 2                             | 7                                 |
| Total                 | 75                    | 76                            | 60                            | 79                                |

The heterozygous sporophytes were derived by crossing two gametophytes carrying respectively the *imm* and *oro* mutations.

**Table S4. Phenotypic analysis of families of gametophytes derived by back-crossing a gametophyte carrying both the *imm* and *oro* mutations with a wild-type strain**

| Unilocular sporangium | No. of individuals* | No. of <i>oro</i> individuals | No. of <i>imm</i> individuals | No. of <i>imm oro</i> individuals | No. of wild-type individuals |
|-----------------------|---------------------|-------------------------------|-------------------------------|-----------------------------------|------------------------------|
| 1                     | 21                  | 6                             | 5                             | 6                                 | 4                            |
| 2                     | 16                  | 5                             | 3                             | 3                                 | 5                            |
| 3                     | 16                  | 3                             | 3                             | 4                                 | 6                            |
| 4                     | 14                  | 6                             | 2                             | 3                                 | 3                            |
| 5                     | 26                  | 9                             | 3                             | 9                                 | 5                            |
| 6                     | 17                  | 3                             | 3                             | 5                                 | 6                            |
| 7                     | 16                  | 5                             | 6                             | 2                                 | 3                            |
| Total                 | 126                 | 37                            | 25                            | 32                                | 32                           |

\*Number of individuals scored per unilocular sporangium.

**Table S5. Fold differences in transcript abundance relative to the wild-type sporophyte, as measured by qRT-PCR**

| Locus ID     | Predicted function                              | Fold change expression (log2) |                 |                     |         |
|--------------|-------------------------------------------------|-------------------------------|-----------------|---------------------|---------|
|              |                                                 | <i>imm</i> /pSP               | <i>oro</i> /pSP | <i>imm oro</i> /pSP | GA/pSP  |
| Esi0009_0052 | 3'5'-Cyclic nucleotide phosphodiesterase domain | 1.76                          | 2.32            | 1.92                | 1.97    |
| Esi0049_0053 | Adhesin-like protein                            | 5.13**                        | 5.81**          | 3.88**              | 3.68**  |
| Esi0068_0016 | Swi/SNF domain protein                          | −1.49                         | 0.41            | 0.37                | 2.10    |
| Esi0074_0057 | Homeodomain-like                                | 0.01                          | 2.13            | 2.18*               | 6.12*   |
| Esi0095_0057 | Transcription factor (Myb and SANT domains)     | −2.74*                        | −3.23*          | −2.93*              | −4.55*  |
| Esi0203_0032 | Argonaut                                        | −1.63**                       | −1.46**         | −1.89**             | −0.97** |
| Esi0245_0009 | <i>imm</i> down-regulated 17                    | −2.22                         | −4.82           | −3.94               | −7.31*  |
| Esi0292_0018 | SMAD/FHA domain protein                         | −1.37                         | −1.38           | −0.90               | −0.35   |
| Esi0308_0025 | Serine/threonine-protein kinase                 | 4.61**                        | 7.18**          | 9.36**              | 10.59** |
| Esi0556_0008 | Putative cell wall structural protein           | 2.50                          | 10.46**         | 11.33**             | 13.20** |

Fold changes, calculated using log2 values, are the average of three independent biological replicates. Significant differences (ANOVA) with respect to transcript abundance in wild-type sporophytes are indicated. \* $P < 0.05$ ; \*\* $P < 0.01$ . GA, wild-type gametophyte; *imm*, *imm* mutant; *oro*, *oro* mutant; pSP, wild-type partheno-sporophyte.

**Table S6. *Ectocarpus* strains used in this study**

| Name    | Generation, sex | Life history phenotype | Genotype                  | Description                                                                   | Origin                    | Year | CCAP strain code |
|---------|-----------------|------------------------|---------------------------|-------------------------------------------------------------------------------|---------------------------|------|------------------|
| Ec17    | SP              | Wild type              | ORO ORO                   | Field isolate                                                                 | San Juan de Marcona, Peru | 1988 | CCAP 1310/193    |
| Ec25    | GA f            | Wild type              | ORO                       | Meiotic offspring from Ec17                                                   | Laboratory                | 2002 | CCAP 1310/3      |
| Ec32    | GA m            | Wild type              | ORO                       | Meiotic offspring from Ec17                                                   | Laboratory                | 2002 | CCAP 1310/4      |
| Ec137   | GA m            | <i>imm</i>             | <i>imm</i>                | Meiotic offspring from Ec17, carrying <i>imm</i> mutation                     | Laboratory                | 2002 | CCAP 1310/319    |
| Ec197   | SP              | Wild type              | <i>imm</i> IMM<br>oro ORO | Cross 597f <i>imm</i> +oro x 32m                                              | Laboratory, this work     | 2009 |                  |
| Ec372   | SP              | Wild type              | IMM <i>imm</i>            | Cross 25f wt x 137m <i>imm</i>                                                | Laboratory                | 2003 | CCAP 1310/320    |
| Ec400   | GA m            | no data                | No data                   | Male reference strain for sex test by crossing                                | Laboratory                | 2002 | CCAP 1310/329    |
| Ec410   | GA f            | no data                | No data                   | Female reference strain for sex test by crossing                              | Laboratory                | 2002 | CCAP 1310/330    |
| Ec419   | GA f            | <i>imm</i>             | <i>imm</i> ORO            | Female gametophyte carrying the <i>imm</i> mutation, wild type for <i>oro</i> | Laboratory                | 2003 | CCAP1310/321     |
| Ec494   | GA m            | <i>oro</i>             | <i>oro</i>                | UV-mutagenized Ec32, life-history mutant " <i>ouroboros</i> "                 | Laboratory, this work     | 2005 |                  |
| Ec568   | GA f            | Wild type              | ORO                       | Meiotic offspring from Ec721                                                  | Laboratory                | 2006 | CCAP 1310/334    |
| Ec555   | SP              | Wild type              | ORO <i>oro</i>            | Cross 25f wt x 494m <i>oro</i>                                                | Laboratory, this work     | 2005 |                  |
| Ec556   | SP              | Wild type              | ORO <i>oro</i>            | Cross 25f wt x 494m <i>oro</i>                                                | Laboratory, this work     | 2005 |                  |
| Ec557   | SP              | Wild type              | ORO <i>oro</i>            | Cross 25f wt x 494m <i>oro</i>                                                | Laboratory, this work     | 2005 |                  |
| Ec560   | GA f            | <i>oro</i>             | <i>oro</i>                | Meiotic offspring from Ec557                                                  | Laboratory, this work     | 2005 |                  |
| Ec561   | GA m            | <i>oro</i>             | <i>oro</i>                | Meiotic offspring from Ec556                                                  | Laboratory, this work     | 2005 |                  |
| Ec702   | SP              | Wild type              | ORO <i>oro</i>            | Cross 568f wt x 561m <i>oro</i>                                               | Laboratory, this work     | 2007 |                  |
| Ec566   | SP              | Wild type              | <i>imm</i> IMM<br>oro ORO | Cross 419f <i>imm</i> x 494m <i>oro</i>                                       | Laboratory, this work     | 2006 |                  |
| Ec581-9 | GA m            | <i>oro</i>             | <i>oro oro</i>            | Cross of 560f o x 494m o                                                      | Laboratory, this work     | 2006 |                  |
| Ec592   | GA              | Wild type              | IMM ORO                   | Meiotic offspring from 566                                                    | Laboratory, this work     | 2007 |                  |
| Ec594   | GA              | <i>imm</i>             | <i>imm</i> ORO            | Meiotic offspring from 566                                                    | Laboratory, this work     | 2007 |                  |
| Ec597   | GA f            | <i>imm oro</i>         | <i>imm oro</i>            | Meiotic offspring from 566                                                    | Laboratory, this work     | 2007 |                  |
| Ec600   | GA              | <i>oro</i>             | IMM <i>oro</i>            | Meiotic offspring from 566                                                    | Laboratory, this work     | 2007 |                  |
| Ec721   | SP              | Wild type              | ORO ORO                   | Field isolate                                                                 | Arica, Chile              | 2006 |                  |

CCAP, Culture Collections of Algae and Protozoa (marine) reference number, Dunstaffnage Marine Laboratory, Oban, Scotland; GA, gametophyte; *imm*, immediate upright mutation; *oro*, *ouroboros* mutation; SP, sporophyte.

**Table S7. Oligonucleotides used for the qRT-PCR analysis**

| Locus_ID                       | Sequence              | Amplicon size, bp |
|--------------------------------|-----------------------|-------------------|
| Esi0009_0052                   |                       |                   |
| 3'UTR                          | AAGCGGGTTTACCGAGTGTT  | 149               |
| 3'UTR                          | GCGCTCCATTTCTTCTCT    |                   |
| Esi0010_0199                   |                       |                   |
| Last exon                      | AGGAGAAGACGGCACGATT   | 92                |
| Last exon                      | GGCCATTCCCAAAGTCCT    |                   |
| Esi0049_0053                   |                       |                   |
| 3'UTR                          | ATCGTGTTCAAGTCGGATGG  | 139               |
| 3'UTR                          | GAGCAGTCTCAGGACCAACAA |                   |
| Esi0068_0016                   |                       |                   |
| Exon 4                         | CTCCCGAAACAACAATGAA   | 95                |
| Exon 4                         | GTCTGACCGCGCTTGATAAC  |                   |
| Esi0074_0057                   |                       |                   |
| 3'UTR                          | GGGTAAAGGGACAGCAACA   | 125               |
| 3'UTR                          | CAGCGAGGGAGGTGATTAGA  |                   |
| Esi0095_0057                   |                       |                   |
| 3'UTR                          | ATCAGGCTGAGGTGGTGTTC  | 111               |
| 3'UTR                          | ACCCGGAATATCGACAGGTT  |                   |
| Esi0138_0012                   |                       |                   |
| 3'UTR                          | CAGCTACGTGTCGATCTTGG  | 121               |
| 3'UTR                          | GATGGATGTCAGAGAGGCAGA |                   |
| Esi0203_0032                   |                       |                   |
| 3'UTR                          | GCCGATGTCTGTCTTGTTC   | 141               |
| 3'UTR                          | TCTAGCCTGCCTGTTCTGTT  |                   |
| Esi0245_0009                   |                       |                   |
| 3'UTR                          | GAACAACGACCTCCGTAACC  | 132               |
| 3'UTR                          | GCCGCAACCATGAAGTAATC  |                   |
| Esi0292_0018                   |                       |                   |
| 3'UTR                          | AGCCTTGTTTGGTACGTGGA  | 110               |
| 3'UTR                          | CAACCCGCCAAAGATAGATG  |                   |
| Esi0308_0025                   |                       |                   |
| Last exon                      | CTCAACCAAGGCTGTGACC   | 132               |
| 3'UTR                          | CGGTTCTCATCTTGGTACTCT |                   |
| Esi0445_0006                   |                       |                   |
| 3'UTR                          | GATGGCGGGAACAACAACA   | 134               |
| 3'UTR                          | CAACAGACCGACCAAATAC   |                   |
| Esi0556_0008                   |                       |                   |
| 3'UTR                          | GTATCTGGCGACTGGATGCT  | 101               |
| 3'UTR                          | CGACGGAAACCCAGGTAAA   |                   |
| Esi0387_0021 (EsEF1 $\alpha$ ) |                       |                   |
| Last exon                      | CAAGTCCGTCGAGAAGAAGG  | 147               |
| 3'UTR                          | CCAGCAACACCACAATGTCT  |                   |

Locus\_ID, *Ectocarpus* gene model.

## Other Supporting Information Files

[Dataset S1 \(XLSX\)](#)
